# Supplementary material for: Targeting Molecular Mechanisms of Obesity- and Type 2 Diabetes Mellitus-Induced Skeletal Muscle Atrophy with Nerve Growth Factor
Source: MDPI journal article supplement (doi:10.3390/ijms25084307), 2024-04-13
Supplement: s1 [file s1]

### Cytosolic Fraction

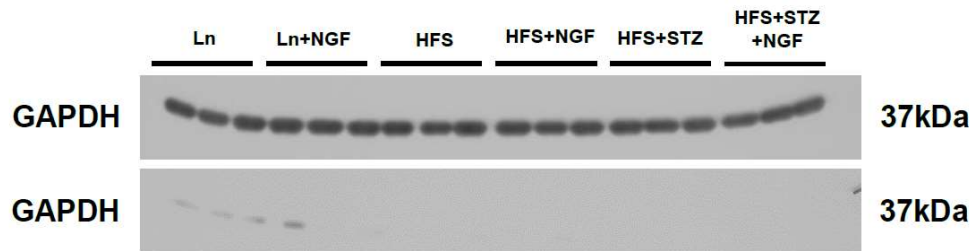

### Nuclear Fraction

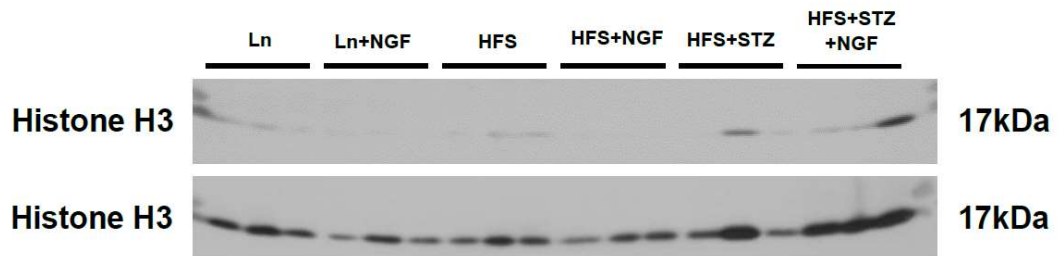

**Figure S1.** Western blot analysis of cytosolic and nuclear fractions from gastrocnemius muscle tissue lysate. Markers of cytosolic fraction (GAPDH) and nuclear fraction (Histone H3) were used to control fractionation quality.
